# Supplementary material
Source: publisher figshare collection journal article supplement (https://frontiersin.figshare.com/ndownloader/files/13268513)
Supplement: Supplementary file [file 13268513]

Suppl. Table 2. Whole brain grey matter (GM) and white matter (WM) volumes of the original segmented images after controlling for total intracranial volume (calculated as the sum of GM, WM and Cerebrospinal fluid).

|              | <b>GM whole tissue</b> | <b>WM whole tissue</b> |
|--------------|------------------------|------------------------|
| CW second T1 | 0.43                   | 0.30                   |
| CW first T1  | 0.46                   | 0.43                   |
